# Supplementary material for: Highly Sensitive Fluorescence Detection of Three Organophosphorus Pesticides Based on Highly Bright DNA-Templated Silver Nanoclusters
Source: MDPI journal article supplement (doi:10.3390/bios13050520), 2023-05-05
Supplement: s1 [file s1]

## Supporting Information

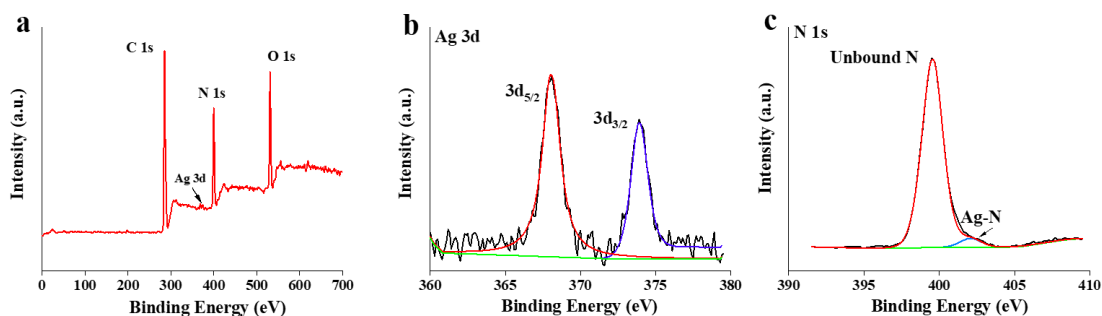

**Figure S1.** (a) The whole XPS spectrum (b) Ag 3d (c) N1s XPS spectrum of DNA2-Ag NCs

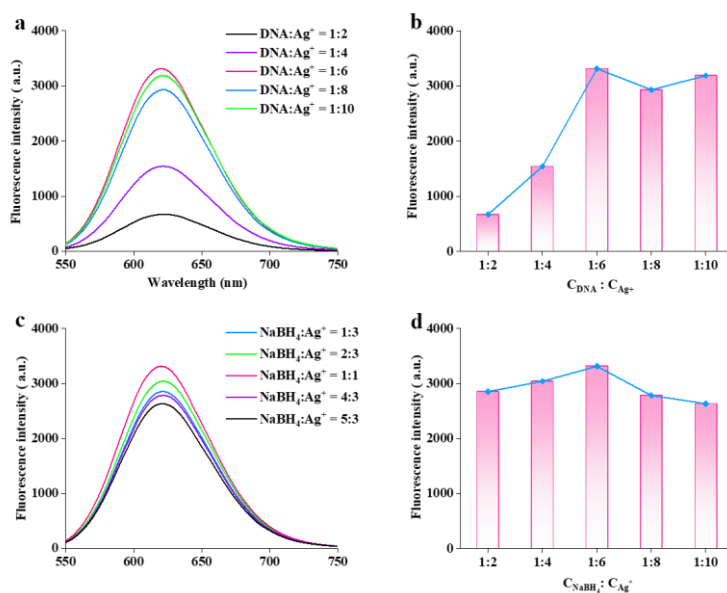

**Figure S2.** Optimization of synthesis conditions of DNA2-Ag NCs. Fluorescence spectrum of optimization on (a) DNA: Ag<sup>+</sup> (c) NaBH<sub>4</sub>: Ag<sup>+</sup>. The histogram figure of optimization on (b) DNA: Ag<sup>+</sup> (d) NaBH<sub>4</sub>: Ag<sup>+</sup>

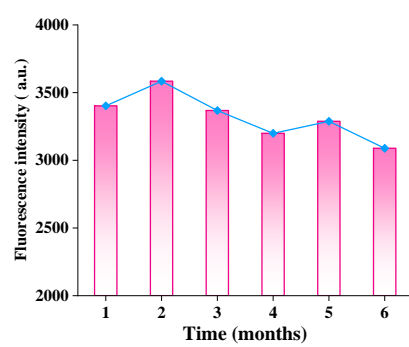

**Figure S3.** The stability of DNA2-Ag NCs
